# Supplementary material for: A modified BCG with depletion of enzymes associated with peptidoglycan amidation induces enhanced protection against tuberculosis in mice
Source: eLife journal article supplement (doi:10.7554/elife.89157), 2024-04-19
Supplement: supp [file Figure 2 Source data.xlsx]

## Sheet: Fig 2A
Fig 2A BMDM infection with WT BCG vs rBCG (& activation with Anhydrotetracycline)
	CFU counts
	WT			rBCG 0 ng ATC			rBCG 100 ng ATC			rBCG 200 ng ATC			rBCG 300 ng ATC			rBCG 400 ng ATC			rBCG 500 mng ATC
Days	Replicate 1	Replicate 2	Replicate 3	Replicate 1	Replicate 2	Replicate 3	Replicate 1	Replicate 2	Replicate 3	Replicate 1	Replicate 2	Replicate 3	Replicate 1	Replicate 2	Replicate 3	Replicate 1	Replicate 2	Replicate 3	Replicate 1	Replicate 2	Replicate 3
1	168000	169000	155000	156000	167000	166000	150000	151000	162000	161000	162000	158000	156000	157000	143000	164000	165000	157000	146000	147000	170000
3	118000	110000	121000	112000	116000	119000	62000	64000	71000	61000	62000	68000	79000	80000	65000	70000	72000	67000	66000	68000	74000
5	137000	138000	142000	140000	141000	147000	95000	96000	98000	105000	106000	112000	97000	98000	91000	69000	70000	73000	61000	62000	59000

## Sheet: Fig 2B
Fig 2B Monocyte training Experiment
					Macrophage stimulant
	RPMI			LPS				MDP			BCG			rBCG
	Replicate 1	Replicate 2	Replicate 3	Replicate 1	Replicate 2	Replicate 3	Replicate 1	Replicate 2	Replicate 3	Replicate 1	Replicate 2	Replicate 3	Replicate 1	Replicate 2	Replicate 3
	30000	90000	21000	30000	110000	44800	30000	40000	10000	16000	20000	12000	3000	3000	12000
	Mean CFU			Mean CFU			Mean CFU			Mean CFU			Mean CFU
Mtb CFU	47000			61600			26666.7			16000			6000

## Sheet: Fig 2C
Fig 2C WT BCG CFU in Doxycline supplemented media
CFU counts
		WT 0ng/ml DOX			WT 12.5 ng/ml DOX			WT 25 ng/ml DOX			WT 50 ng/ml DOX			WT 100 ng/ml
Days	Replicate 1	Replicate 2	Replicate 3	Replicate 1	Replicate 2	Replicate 3	Replicate 1	Replicate 2	Replicate 3	Replicate 1	Replicate 2	Replicate 3	Replicate 1	Replicate 2	Replicate 3
Day 1	17200	23600	28400	20800	28400	19600	18000	20000	14000	28400	17600	22400	17200	18400	18400
Day 3	1040000	640000	800000	1240000	1200000	640000	240000	290000	250000	320000	220000	310000	150000	210000	190000
Day 5	26000000	83000000	82000000	8000000	28000000	54000000	33000000	29000000	25000000	33000000	39000000	40000000	25000000	9000000	50000000

## Sheet: Fig 2D
Fig 2D rBCG CFU in Doxycline supplemented media
CFU counts
	rBCG 0ng/ml DOX			rBCG 12.5 ng/ml DOX			rBCG 25 ng/ml DOX			rBCG 50 ng/ml DOX			rBCG 100 ng/ml
Days	Replicate 1	Replicate 2	Replicate 3	Replicate 1	Replicate 2	Replicate 3	Replicate 1	Replicate 2	Replicate 3	Replicate 1	Replicate 2	Replicate 3	Replicate 1	Replicate 2	Replicate 3
Day 1	23200	20800	25200	28800	20800	18000	12800	20000	21200	21200	19600	24400	22000	14000	10800
Day 4	1120000	560000	760000	680000	800000	920000	400000	530000	450000	370000	430000	350000	230000	140000	160000
Day 6	90000000	45000000	39000000	3000000	17000000	12000000	160000	220000	130000	7600	10800	8000	3100	4000	2000

## Sheet: Fig 2F
Fig 2F Aerosol infection of BalB/c mice with rBCG and activation with Doxycyline (without kanamycin)
	Replicate 1	Replicate 2	Replicate 3	Replicate 1	Replicate 2	Replicate 3	Replicate 1	Replicate 2	Replicate 3	Replicate 1	Replicate 2	Replicate 3	Replicate 1	Replicate 2	Replicate 3
	PBS			0.125 mg/kg Dox			0.250 mg/kg Dox			0.500 mg/kg Dox			1 mg/kg Dox
rBCG CFU	1812	1380	1916	1832	2364	1120	564	1136	1672	1808	1356	1576	944	1056	536

## Sheet: Fig 2G
Fig 2G Aerosol infection of BalB/c mice with rBCG and activation with Doxycyline (with kanamycin)
	Replicate 1	Replicate 2	Replicate 3	Replicate 1	Replicate 2	Replicate 3	Replicate 1	Replicate 2	Replicate 3	Replicate 1	Replicate 2	Replicate 3	Replicate 1	Replicate 2	Replicate 3
		PBS		0.125 mg/kg Dox			0.250 mg/kg Dox			0.500 mg/kg Dox			1 mg/kg Dox
rBCG CFU	1192	1036	1464	1256	1320	1076	1376	1308	812	1392	1072	836	656	688	812
