# Supplementary material for: A modified BCG with depletion of enzymes associated with peptidoglycan amidation induces enhanced protection against tuberculosis in mice
Source: eLife journal article supplement (doi:10.7554/elife.89157), 2024-04-19
Supplement: supp [file Figure 3 Source data.xlsx]

## Sheet: Fig 3B
Fig 3B. SCID time to death experiment
Days	WT BCG	WT BCG+DOX	rBCG	rBCG+DOX
140	1
189		1
203				1
231	1
238			1
246				1
251				1
258		1
261			1
269	1
285	1
286			1
289			1
296	1	1
300			1
306		1
311		1
326				1
333				1
	Numbers show how many mice died on the day
