# Supplementary material for: A modified BCG with depletion of enzymes associated with peptidoglycan amidation induces enhanced protection against tuberculosis in mice
Source: eLife journal article supplement (doi:10.7554/elife.89157), 2024-04-19
Supplement: supp [file Figure 4 Source data.xlsx]

## Sheet: Fig 4C
Fig 4E Week 4 and 8 rBCG Vax efficacy
Week 4 Lung CFUs
	Saline+DOX					WT BCG					WT BCG+DOX					rBCG					rBCG+DOX
	M1	M2	M3	M4	M5	M1	M2	M3	M4	M5	M1	M2	M3	M4	M5	M1	M2	M3	M4	M5	M1	M2	M3	M4	M5
Lung CFU	1.41763e+06	3.81887e+06	1.67276e+06	4.62305e+06	2.38225e+06	621013	71942.4	91621.6	1.13598e+06	126043	822500	507143	747087	257500	796489	347586	640000	495940	157500	337674	318722	15780.3	113397	186398	125605
Week 8 Lung CFUs
	Saline+DOX					WT BCG					WT BCG+DOX					rBCG					rBCG+DOX
	M1	M2	M3	M4	M5	M1	M2	M3	M4	M5	M1	M2	M3	M4	M5	M1	M2	M3	M4	M5	M1	M2	M3	M4	M5
Lung CFU	4.47219e+06	1.18919e+06	1.67885e+06	5.6811e+06	6.67969e+06	1.11556e+06	222256	2.39808e+06	4.73774e+06	5.73221e+06	6.16883e+06	5.57594e+06	5.69793e+06	2.1039e+06	3.5193e+06	4.05604e+06	5.89096e+06	1.33525e+06	179167	3.47083e+06	503521	294828	170922	1.02992e+06	294444
M=mouse

## Sheet: Fig 4D
Fig 3F Week 4 and 8 rBCG Vax efficacy
Week 4 Spleen CFUs
	Saline+DOX					WT BCG					WT BCG+DOX					rBCG					rBCG+DOX
	M1	M2	M3	M4	M5	M1	M2	M3	M4	M5	M1	M2	M3	M4	M5	M1	M2	M3	M4	M5	M1	M2	M3	M4	M5
Spleen CFU	435000	550000	18500	104500	46500	6900	3600	3150	28000	750	17750	11450	4850	850	2500	2200	16000	36000	1150	6800	15000	4050	1450	39500	3800
Week 8 Spleen CFUs
	Saline+DOX					WT BCG					WT BCG+DOX					rBCG					rBCG+DOX
	M1	M2	M3	M4	M5	M1	M2	M3	M4	M5	M1	M2	M3	M4	M5	M1	M2	M3	M4	M5	M1	M2	M3	M4	M5
Spleen CFU	545000	115000	135000	140000	550000	50000	15000	5000	105000	95000	70000	50000	30000	380000	150000	290000	20000	20000	170000	70000	10000	15000	27000	70000	80000
M=mouse
