# Supplementary material for: A modified BCG with depletion of enzymes associated with peptidoglycan amidation induces enhanced protection against tuberculosis in mice
Source: eLife journal article supplement (doi:10.7554/elife.89157), 2024-04-19
Supplement: supp [file Figure 5 Source data.xlsx]

## Sheet: Fig 5B
Fig 4B Week 4 percentage of inflamed area
	Saline+DOX	WT BCG	WT BCG+DOX	rBCG	rBCG+DOX
Mouse 1	15.6396	4.43856	3.61978	5.77288	13.4156
Mouse 2	30.6837	38.7403	4.73488	10.1688	9.28229
Mouse 3	6.06894	7.63735	2.85303	11.2479	13.5102
Mouse 4	2.07653	2.06474	2.08931	13.7882	6.92925
Mouse 5	5.01255	2.15813	0.873715	3.4662	7.129

## Sheet: Fig 5D
Fig 5D Week 8 percentage of inflamed area
	Saline+DOX	WT BCG	WT BCG+DOX	rBCG	rBCG+DOX
Mouse 1	37.217	15.0804	6.77457	10.6448	13.164
Mouse 2	7.27604	14.2621	3.23371	4.26098	9.44264
Mouse 3	7.36376	5.80604	6.04676	15.4419	10.9725
Mouse 4	20.4734	12.0995	8.13693	4.92225	4.65211
Mouse 5	3.62935	7.02871	4.36706	9.85443	7.82602
