# Supplementary material for: A modified BCG with depletion of enzymes associated with peptidoglycan amidation induces enhanced protection against tuberculosis in mice
Source: eLife journal article supplement (doi:10.7554/elife.89157), 2024-04-19
Supplement: supp [file Figure-1 figure supplement 2 source data.xlsx]

## Sheet: Sheet1
	Fig 1 supplement 2 rBCG growth curve
	0 ng Atc			100 ng Atc			200 ng Atc			300 ng Atc			400 ng Atc			500 ng Atc
Time (Days)	OD600nm	Stnd deviation		OD600nm	Stnd deviation		OD600nm	Stnd deviation		OD600nm	Stnd deviation		OD600nm	Stnd deviation		OD600nm	Stnd deviation
0	0.05	8.49837e-18		0.05	8.49837e-18		0.05	8.49837e-18		0.05	8.49837e-18		0.05	8.49837e-18		0.05	8.49837e-18
1	0.065	0.002		0.05	8.49837e-18		0.05	8.49837e-18		0.05	8.49837e-18		0.05	8.49837e-18		0.05	8.49837e-18
2	0.133333	0.0057735		0.1	1.69967e-17		0.12	0		0.113333	0.0057735		0.106667	0.0057735		0.106667	0.0057735
3	0.223333	0.011547		0.176667	0.0057735		0.156667	0.0057735		0.203333	0.0057735		0.146667	0.0057735		0.17	0
4	0.386667	0.0057735		0.283333	0.0057735		0.233333	0.0057735		0.296667	0.0057735		0.226667	0.0057735		0.266667	0.0057735
5	0.42	0.0173205		0.326667	0.0057735		0.263333	0.0057735		0.336667	0.0057735		0.266667	0.0057735		0.336667	0.0057735
6	0.57	0.01		0.34	0		0.386667	0.0057735		0.453333	0.0057735		0.313333	0.0057735		0.343333	0.0057735
