# Supplementary material for: A modified BCG with depletion of enzymes associated with peptidoglycan amidation induces enhanced protection against tuberculosis in mice
Source: eLife journal article supplement (doi:10.7554/elife.89157), 2024-04-19
Supplement: supp [file Figure-1 figure supplement 4 source data.xlsx]

## Sheet: Sheet1
Fig S5. Amine reactive dye: labeling of WT BCG vs rBCG peptidoglycan
WT BCG			rBCG (No ATc)			rBCG (plus ATc)
Sample 1	Sample 2	Sample 3	Sample 1	Sample 2	Sample 3	Sample 1	Sample 2	Sample 3
2888.4	5275.2	3735.85	2199.62	3505.7	4657.07	799.95	463.64	1657.07
