# Supplementary material for: A modified BCG with depletion of enzymes associated with peptidoglycan amidation induces enhanced protection against tuberculosis in mice
Source: eLife journal article supplement (doi:10.7554/elife.89157), 2024-04-19
Supplement: supp [file Figure-1 figure supplement 5 source data.xlsx]

## Sheet: Sheet1
Fig S6. qPCR data for NOD1 and NOD2 expression in Interferon gamma activated and non activated THP-1 macrophages
Sample	Control	Ct			Sample	E. coli	Ct		Sample	WT BCG	Ct		Sample	rBCG	Ct
NOD1	UN1	30.5783			NOD1	EC1	30.9447		NOD1	WT1	28.8114		NOD1	R1	29.083
NOD1	UN2	29.9348			NOD1	EC2	30.9727		NOD1	WT2	27.9171		NOD1	R2	33.2418
NOD1	UN3	29.7507			NOD1	EC3	33.5335		NOD1	WT3	29.517		NOD1	R3	30.0668
NOD1	UN4	30.2125			NOD1	EC4	33.7251		NOD1	WT4	28.3906		NOD1	R4	24.4289
NOD1	UN5	29.4062			NOD1	EC5	31.3692		NOD1	WT5	29.454		NOD1	R5	31.0624
NOD1	UN6	27.8297			NOD1	EC6	30.2692		NOD1	WT6	30.234		NOD1	R6	30.1167
Sample	Control	Ct			Sample	E. coli	Ct		Sample	WT BCG	Ct		Sample	rBCG	Ct
NOD2	UN1	30.3601			NOD2	EC1	32.2264		NOD2	WT1	30.0374		NOD2	R1	29.0686
NOD2	UN2	29.3072			NOD2	EC2	32.4337		NOD2	WT2	28.3928		NOD2	R2	31.2183
NOD2	UN3	28.7312			NOD2	EC3	33.0427		NOD2	WT3	27.7771		NOD2	R3	30.5246
NOD2	UN4	28.5006			NOD2	EC4	32.7239		NOD2	WT4	29.209		NOD2	R4	29.8214
NOD2	UN5	28.5359			NOD2	EC5	31.5765		NOD2	WT5	28.9108		NOD2	R5	30.8985
NOD2	UN6	29.8614			NOD2	EC6	30.5902		NOD2	WT6	30.3633		NOD2	R6	29.5262
Sample	Control	Ct			Sample	E. coli	Ct		Sample	WT BCG	Ct		Sample	rBCG	Ct
GAPDH	UN1	21.4107			GAPDH	EC1	22.3299		GAPDH	WT1	18.5227		GAPDH	R1	20.0689
GAPDH	UN2	20.1308			GAPDH	EC2	23.0187		GAPDH	WT2	19.5304		GAPDH	R2	21.4021
GAPDH	UN3	19.6712			GAPDH	EC3	21.5404		GAPDH	WT3	20.0868		GAPDH	R3	18.9067
GAPDH	UN4	20.2057			GAPDH	EC4	23.8481		GAPDH	WT4	19.0276		GAPDH	R4	27.419
GAPDH	UN5	20.7485			GAPDH	EC5	23.4559		GAPDH	WT5	19.1348		GAPDH	R5	18.6872
GAPDH	UN6	20.0983			GAPDH	EC6	28.253		GAPDH	WT6	20.7459		GAPDH	R6	20.8803
NOD1-Normalized with GAPDH
Sample	Control	Ct	Sample	E. coli	Ct	Sample	WT BCG	Ct	Sample	rBCG	Ct
NOD1	UN1	9.16763	NOD1	EC1	8.61473	NOD1	WT1	10.2887	NOD1	R1	9.01403
NOD1	UN2	9.80397	NOD1	EC2	7.95405	NOD1	WT2	8.38678	NOD1	R2	11.8397
NOD1	UN3	10.0795	NOD1	EC3	11.993	NOD1	WT3	9.43022	NOD1	R3	-0.457799
NOD1	UN4	10.0069	NOD1	EC4	9.87697	NOD1	WT4	9.36307	NOD1	R4	-2.99011
NOD1	UN5	8.65773	NOD1	EC5	7.91325	NOD1	WT5	10.3192	NOD1	R5	12.3752
NOD1	UN6	7.73136	NOD1	EC6	2.01617	NOD1	WT6	9.48816	NOD1	R6	9.23647
NOD2-Normalized with GAPDH
Sample	Control	Ct		Sample	E. coli	Ct		Sample	WT BCG	Ct		Sample	rBCG	Ct
NOD2	UN1	8.9494		NOD2	EC1	9.8965		NOD2	WT1	11.5147		NOD2	R1	8.99971
NOD2	UN2	9.17641		NOD2	EC2	9.41508		NOD2	WT2	8.86239		NOD2	R2	9.81627
NOD2	UN3	9.06		NOD2	EC3	11.5023		NOD2	WT3	7.69031		NOD2	R3	11.6179
NOD2	UN4	8.29493		NOD2	EC4	8.87576		NOD2	WT4	10.1815		NOD2	R4	2.40241
NOD2	UN5	7.7874		NOD2	EC5	8.12057		NOD2	WT5	9.77602		NOD2	R5	12.2113
NOD2	UN6	9.76305		NOD2	EC6	2.3372		NOD2	WT6	9.61745		NOD2	R6	8.64598
Sample	Control	ΔΔCt		Sample	E. coli	ΔΔCt		Sample	WT BCG	ΔΔCt		Sample	rBCG	ΔΔCt
NOD2	UN1	8.9494		NOD2	EC1	9.8965		NOD2	WT1	11.5147		NOD2	R1	8.99971
NOD2	UN2	9.17641		NOD2	EC2	9.41508		NOD2	WT2	8.86239		NOD2	R2	9.81627
NOD2	UN3	9.06		NOD2	EC3	11.5023		NOD2	WT3	7.69031		NOD2	R3	11.6179
NOD2	UN4	8.29493		NOD2	EC4	8.87576		NOD2	WT4	10.1815		NOD2	R4	2.40241
NOD2	UN5	7.7874		NOD2	EC5	8.12057		NOD2	WT5	9.77602		NOD2	R5	12.2113
NOD2	UN6	9.76305		NOD2	EC6	2.3372		NOD2	WT6	9.61745		NOD2	R6	8.64598
Sample	Control	2^-ΔΔCt		Sample	E. coli	2^-ΔΔCt		Sample	WT BCG	2^-ΔΔCt		Sample	rBCG	2^-ΔΔCt
NOD2	UN1	0.00202284		NOD2	EC1	0.0010492		NOD2	WT1	0.000341775		NOD2	R1	0.00195352
NOD2	UN2	0.00172832		NOD2	EC2	0.0014648		NOD2	WT2	0.0021486		NOD2	R2	0.00110919
NOD2	UN3	0.00187357		NOD2	EC3	0.000344722		NOD2	WT3	0.00484158		NOD2	R3	0.000318177
NOD2	UN4	0.00318403		NOD2	EC4	0.00212878		NOD2	WT4	0.000861132		NOD2	R4	0.189149
NOD2	UN5	0.00452645		NOD2	EC5	0.00359307		NOD2	WT5	0.00114058		NOD2	R5	0.000210875
NOD2	UN6	0.00115088		NOD2	EC6	0.197894		NOD2	WT6	0.00127309		NOD2	R6	0.00249633
NOD-2 expression	Sample	activated THP-1	STDEV	Sample	non-activated THP-1	STDEV
	Control	0.00295379	0.666405	control	0.00187491	0.078706
	E. coli	0.0678719	1.80725	E. coli	0.000952907	0.699753
	WT BCG	0.0010916	0.195204	WT BCG	0.00244398	1.48363
	rBCG	0.0639519	3.394	rBCG	0.00112696	0.925745
