# Supplementary material for: A modified BCG with depletion of enzymes associated with peptidoglycan amidation induces enhanced protection against tuberculosis in mice
Source: eLife journal article supplement (doi:10.7554/elife.89157), 2024-04-19
Supplement: supp [file Figure-2 figure supplement 1 souce data.xlsx]

## Sheet: Sheet1
Fig 2 supplement 1TNF alpha ELISA
	LPS IFNy-			LPS IFNy+
	Replicate 1	Replicate 2	Replicate 3	Replicate 1	Replicate 2	Replicate 3
	468.242	495.719	401.656	704.904	1096.92	543.898
	No infection IFNy-			No infection IFNy+
	Replicate 1	Replicate 2	Replicate 3	Replicate 1	Replicate 2	Replicate 3
	6.70683	4.47269	7.79877	11.1894	11.1894	11.1894
	WT IFNy- [0 ng ATC]			WT IFNy+ [0 ng ATC]
	Replicate 1	Replicate 2	Replicate 3	Replicate 1	Replicate 2	Replicate 3
	745.07	511.357	19.3381	1092.72	629.47	424.541
	rBCG IFNy- [0 ng ATC]			rBCG IFNy+ [0 ng ATC]
	Replicate 1	Replicate 2	Replicate 3	Replicate 1	Replicate 2	Replicate 3
	520.469	353.433	371.542	1122.51	759.775	378.441
	No infection IFNy- [250 ng ATC]			No infection IFNy+ [250 ng ATC]
	Replicate 1	Replicate 2	Replicate 3	Replicate 1	Replicate 2	Replicate 3
	0.772682	5.58359	20.212	6.76981	5.58359	22.48
	WT IFNy- [250 ng ATC]			WT IFNy+ [250 ng ATC]
	Replicate 1	Replicate 2	Replicate 3	Replicate 1	Replicate 2	Replicate 3
	478.731	622.786	695.072	710.558	1205.66	945.154
	rBCG IFNy- [250 ng ATC]			rBCG IFNy+ [250 ng ATC]
	Replicate 1	Replicate 2	Replicate 3	Replicate 1	Replicate 2	Replicate 3
	435.212	594.943	583.103	1150.98	1157.66	1187.12
	No infection IFNy- [500 ng ATC]			No infection IFNy+ [500 ng ATC]
	Replicate 1	Replicate 2	Replicate 3	Replicate 1	Replicate 2	Replicate 3
	6.707	8.946	13.438	20.212	17.949	8.9662
	WT IFNy- [500 ng ATC]			WT IFNy+ [500 ng ATC]
	Replicate 1	Replicate 2	Replicate 3	Replicate 1	Replicate 2	Replicate 3
	979.954	827.122	812.967	1862.89	1525.76	1035.68
	rBCG IFNy- [500 ng ATC]			rBCG IFNy+ [500 ng ATC]
	Replicate 1	Replicate 2	Replicate 3	Replicate 1	Replicate 2	Replicate 3
	797.478	1027.8	696.472	1531.83	2403.52	1368.74
