# Supplementary material for: A modified BCG with depletion of enzymes associated with peptidoglycan amidation induces enhanced protection against tuberculosis in mice
Source: eLife journal article supplement (doi:10.7554/elife.89157), 2024-04-19
Supplement: supp [file Figure-4 figure supplement 1 source data.xlsx]

## Sheet: Sheet1
Fig 4 supplement 1, Week 4 & 8 lung Weights
Week 4 Lung weights
Saline+DOX					WT BCG					WT BCG DOX					rBCG					rBCG DOX
M1	M2	M3	M4	M5	M1	M2	M3	M4	M5	M1	M2	M3	M4	M5	M1	M2	M3	M4	M5	M1	M2	M3	M4	M5
0.219	0.24	0.245	0.214	0.305	0.223	0.2	0.226	0.243	0.219	0.188	0.2	0.162	0.206	0.222	0.224	0.192	0.194	0.252	0.198	0.216	0.251	0.232	0.249	0.232
Week 8 Lung weights
Saline+DOX					WT BCG					WT BCG DOX					rBCG					rBCG DOX
M1	M2	M3	M4	M5	M1	M2	M3	M4	M5	M1	M2	M3	M4	M5	M1	M2	M3	M4	M5	M1	M2	M3	M4	M5
0.261	0.22	0.291	0.242	0.36	0.251	0.243	0.258	0.243	0.234	0.253	0.206	0.243	0.24	0.236	0.237	0.254	0.232	0.215	0.238	0.22	0.228	0.241	0.218	0.212
M= mouse
Fig S9B Week 4 & 8 Spleen Weights
Week 4 spleen weights
Saline+DOX					WT BCG					WT BCG DOX					rBCG					rBCG DOX
M1	M2	M3	M4	M5	M1	M2	M3	M4	M5	M1	M2	M3	M4	M5	M1	M2	M3	M4	M5	M1	M2	M3	M4	M5
0.148	0.171	0.122	0.163	0.107	0.118	0.139	0.115	0.132	0.093	0.115	0.101	0.102	0.117	0.124	0.109	0.125	0.108	0.107	0.123	0.13	0.129	0.113	0.142	0.156
Week 8 spleen weights
Saline+DOX					WT BCG					WT BCG DOX					rBCG					rBCG DOX
M1	M2	M3	M4	M5	M1	M2	M3	M4	M5	M1	M2	M3	M4	M5	M1	M2	M3	M4	M5	M1	M2	M3	M4	M5
0.14	0.143	0.14	0.13	0.173	0.122	0.123	0.146	0.117	0.091	0.137	0.08	0.182	0.144	0.132	0.093	0.14	0.091	0.136	0.13	0.13	0.129	0.129	0.139	0.104
M=mouse
