# Supplementary material for: A modified BCG with depletion of enzymes associated with peptidoglycan amidation induces enhanced protection against tuberculosis in mice
Source: eLife journal article supplement (doi:10.7554/elife.89157), 2024-04-19
Supplement: supp [file Table 1 source data.xlsx]

## Sheet: Sheet1
Table 1. Minimum inhibitory concentrations
